# Supplementary material
Source: PubMed Central journal article supplement (PMC2786630)
Supplement: supp_47_12_4113__1.pdf [file supp_47_12_4113__1.pdf]

1

2 **SUPPLEMENTARY MATERIAL**3 TABLE S1. Growth of *Enterococcus species* type strains (n = 38) in pure culture on C-ID and CHR

| <i>Enterococcus species</i> | Collection No.          | Vancomycin<br>MIC (mg/L) | C-ID <sup>a</sup> | CHR <sup>b</sup> |
|-----------------------------|-------------------------|--------------------------|-------------------|------------------|
| <i>E. aquimarinus</i>       | LMG <sup>c</sup> 16607  | 0.125                    | —                 | —                |
| <i>E. asini</i>             | DSM <sup>d</sup> 11492  | 1.000                    | —                 | —                |
| <i>E. avium</i>             | DSM 20679               | 0.750                    | —                 | —                |
| <i>E. caccae</i>            | CCUG <sup>e</sup> 51564 | 0.750                    | —                 | —                |
| <i>E. canintestini</i>      | LMG 13590               | 0.750                    | —                 | —                |
| <i>E. canis</i>             | CCUG 46666              | 1.500                    | —                 | —                |
| <i>E. casseliflavus</i>     | DSM 20680               | 2.000                    | —                 | —                |
| <i>E. cecorum</i>           | DSM 20682               | 0.750                    | —                 | —                |
| <i>E. columbae</i>          | DSM 7374                | 0.750                    | —                 | —                |
| <i>E. devriesei</i>         | LMG 14595               | 0.380                    | —                 | —                |
| <i>E. dispar</i>            | DSM 6630                | 0.500                    | —                 | —                |
| <i>E. durans</i>            | DSM 20633               | 0.500                    | —                 | —                |
| <i>E. faecalis</i>          | ATCC <sup>f</sup> 19433 | 0.750                    | —                 | —                |
| <i>E. faecium</i>           | ATCC 19434              | 1.000                    | —                 | —                |
| <i>E. flavescens</i>        | DSM 7370                | 2.000                    | —                 | —                |
| <i>E. gallinarum</i>        | DSM 20623               | 4.000                    | —                 | + <sup>g</sup>   |
| <i>E. gilvus</i>            | CCUG 45553              | 0.750                    | —                 | —                |
| <i>E. haemoperoxidus</i>    | LMG 19487               | 1.000                    | —                 | —                |
| <i>E. hermanniensis</i>     | CCUG 48100              | 0.190                    | —                 | —                |
| <i>E. hirae</i>             | DSM 20160               | ≥ 256                    | —                 | —                |
| <i>E. italicus</i>          | CCUG 50447              | 0.250                    | —                 | —                |
| <i>E. malodoratus</i>       | DSM 20681               | 0.750                    | —                 | —                |
| <i>E. moraviensis</i>       | LMG 19486               | 0.750                    | —                 | —                |
| <i>E. mundtii</i>           | DSM 4838                | 2.000                    | —                 | —                |
| <i>E. pallens</i>           | CCUG 45554              | 2.000                    | —                 | —                |
| <i>E. phoeniculicola</i>    | CCUG 48923              | 0.380                    | —                 | —                |
| <i>E. porcinus</i>          | CCUG 43229              | 1.000                    | —                 | —                |
| <i>E. pseudoavium</i>       | DSM 5632                | 0.250                    | —                 | —                |
| <i>E. raffinosus</i>        | DSM 5633                | 1.000                    | —                 | —                |
| <i>E. ratti</i>             | CCUG 43228              | 1.000                    | —                 | —                |
| <i>E. saccharolyticus</i>   | DSM 20726               | 0.250                    | —                 | —                |
| <i>E. saccharominimus</i>   | LMG 21727               | 0.380                    | —                 | —                |
| <i>E. silesiacus</i>        | LMG 23085               | 0.500                    | —                 | —                |
| <i>E. solitarius</i>        | DSM 5634                | 8.000                    | —                 | —                |
| <i>E. sulfureus</i>         | DSM 6905                | 1.000                    | —                 | —                |
| <i>E. termitis</i>          | LMG 8895                | 0.750                    | —                 | —                |
| <i>E. thailandicus</i>      | DSM 21767               | 0.500                    | —                 | —                |
| <i>E. villorum</i>          | LMG 12287               | 1.000                    | —                 | —                |

4

5 <sup>a</sup>chromID VRE; bioMérieux, Nürtingen Germany; <sup>b</sup>CHROMagar<sup>TM</sup> VRE, CHROMagar, Paris;  
6 distributor: Mast Diagnostika, Rheinfeld, Germany; <sup>c</sup>Laboratorium Voor Microbiologie Gent;  
7 <sup>d</sup>Deutsche Sammlung von Mikroorganismen; <sup>e</sup>Culture Collection University of Göteborg; <sup>f</sup>American  
8 Type Culture Collection; <sup>g</sup>as weakly growing blue colonies

9  
10  
11  
12

TABLE S2. Observed color shades of VRE (VREfs, DSM 13591; VREfm, AC 7029) colony centers and edges on the two media during and after 24 h of incubation

| C-ID                                                                                   |                                                                                           | CHR                                                                                      |                                                                                           |
|----------------------------------------------------------------------------------------|-------------------------------------------------------------------------------------------|------------------------------------------------------------------------------------------|-------------------------------------------------------------------------------------------|
| VREfs                                                                                  | VREfm                                                                                     | VREfs                                                                                    | VREfm                                                                                     |
| 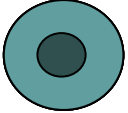 1, a |  5, b    |  11, c |  11, c |
|  2, a |  6, b    |  12, d |  12, d |
|  3, b |  7, b    |                                                                                          |  13, e |
|  4, b |  8, b    |                                                                                          |                                                                                           |
|                                                                                        |  9, b   |                                                                                          |                                                                                           |
|                                                                                        |  10, b |                                                                                          |                                                                                           |
|  a  |                                                                                           |  c   |  c   |
|  b  |  b     |  d   |  d   |
|                                                                                        |                                                                                           |                                                                                          |  e   |

13  
14  
15  
16  
17  
18  
19

1: cadet blue, #5F9EA0; 2: dark olive green, #556B2F; 3: dark sea green, #8FBC8F; 4: powder blue, #B0E0E6; 5: brown, #A52A2A; 6: dark slate blue, #483D8B; 7: Indian red, #CD5C5C; 8: rosy brown, #BC8F8F; 9: slate gray, #708090; 10: pale violet red, #DB7093; 11: plum, #DDA0DD; 12: thistle, #D8BFD8; 13: medium purple, #9370D8;  
a: dark slate gray (colony center), #2F4F4F; b: dim gray (colony center), #696969; c: plum, #DDA0DD; d: thistle, #D8BFD8; e: medium purple, #9370D8;

20

21 TABLE S3. Key tests for specification of isolates

| Species                 | Furazolidone<br>(50 µg) | Mupirocin<br>(10 µg) | Xylose<br>(rapid) <sup>a</sup> | Pyrrolidonyl-<br>arylamidase |
|-------------------------|-------------------------|----------------------|--------------------------------|------------------------------|
| <i>E. faecium</i>       | R <sup>b</sup>          | S <sup>b</sup>       | —                              | +                            |
| <i>E. faecalis</i>      | S                       | R                    | —                              | +                            |
| <i>E. gallinarum</i>    | S                       | S                    | +                              | +                            |
| <i>E. casseliflavus</i> | S                       | S                    | V                              | +                            |
| <i>P. acidilactici</i>  | R                       | R                    | —                              | —                            |
| <i>P. pentosaceus</i>   | S                       | R                    | —                              | —                            |

22

23 <sup>a</sup> Result revealed after 2 h of incubation at 37 °C (Rosco tablets);24 <sup>b</sup> S ≥ 16mm; R: no inhibition zone (Rosco Neo-Sensitabs)

25

26 FIG. S1.

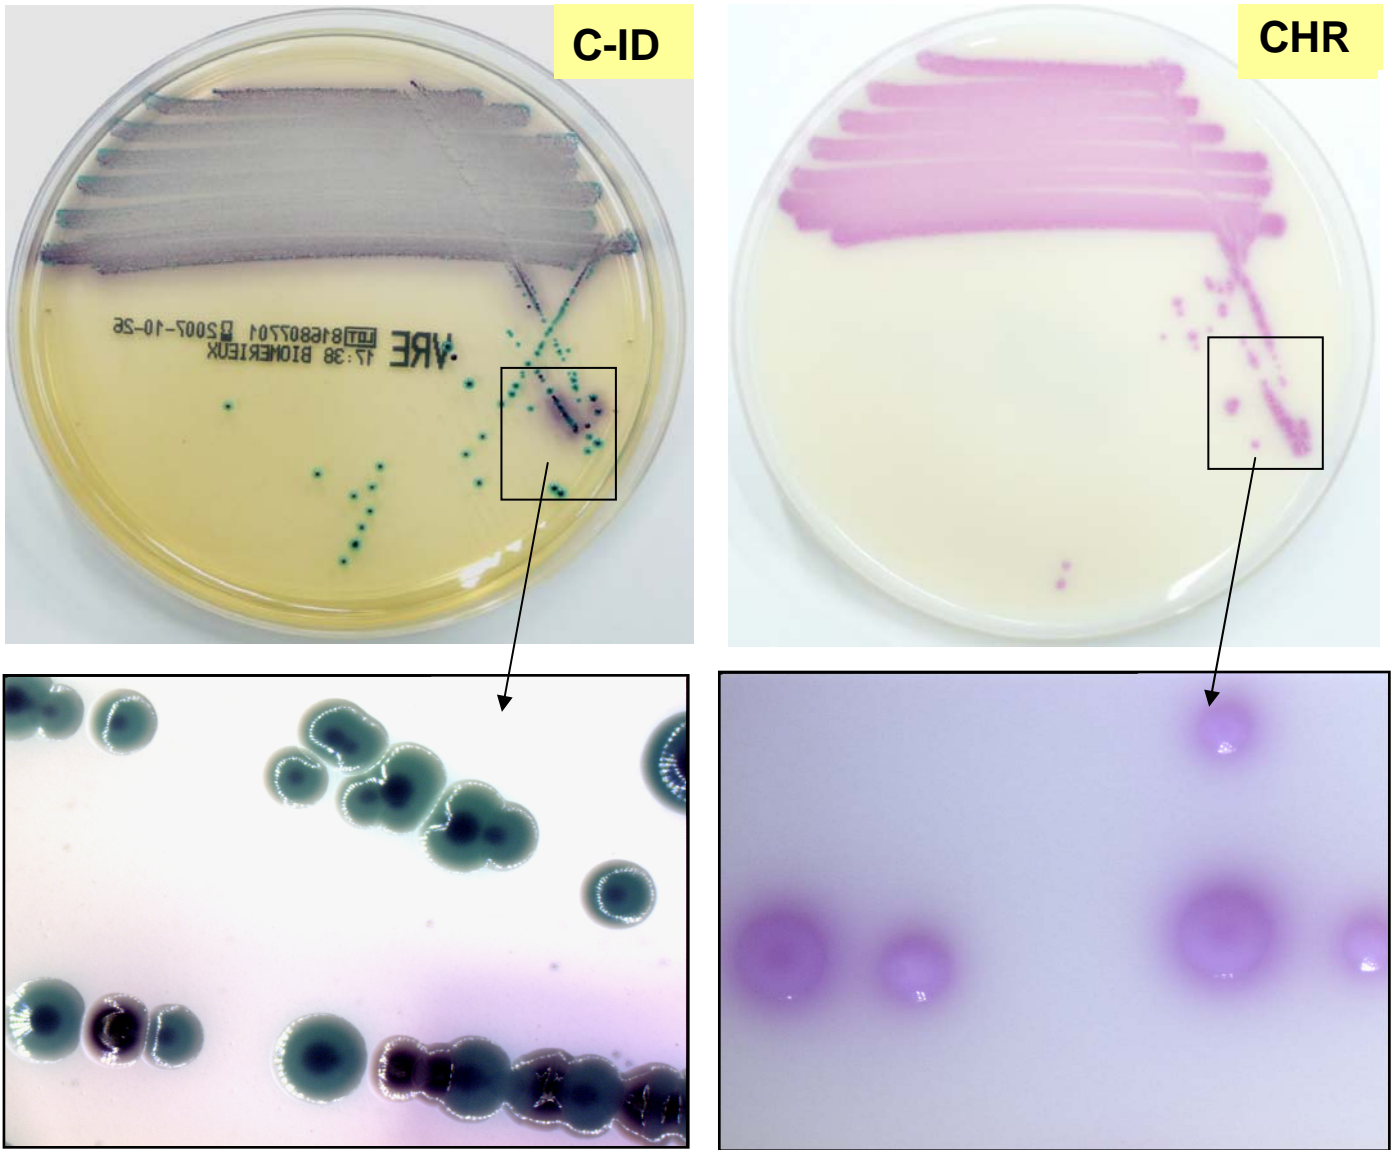

27

28

29 FIG. S2.

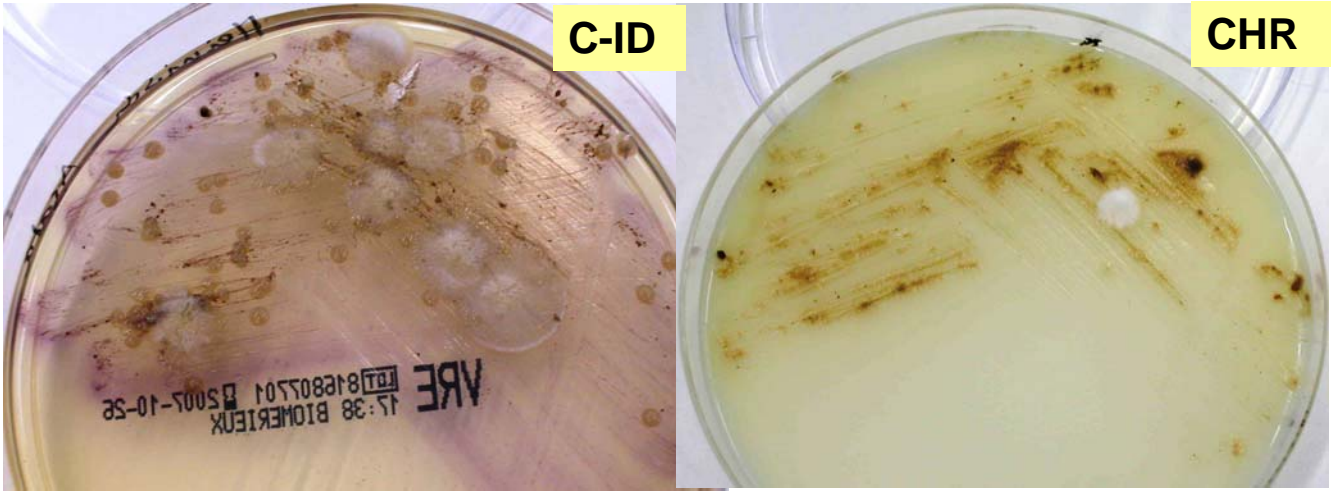

30

31

32 **FIGURE LEGENDS**

33

34 **FIG. S1.** Mixed culture of VREfs and VREfm on C-ID and CHR after 48 h of incubation

35 Right: CHR, VREfs and VREfm mauve; Left: C-ID, VREfs green; VREfm purple.

36

37 **FIG. S2.** VRE-negative stool specimen streaked directly on C-ID and CHR after 48 h of incubation

38 Right: CHR; Left: C-ID
